# Supplementary material
Source: publisher figshare collection journal article supplement (https://acs.figshare.com/ndownloader/files/37575422)
Supplement: Supplementary file 1 [file 37575422]

Compound	SMILE	MHC10(��M)	CC50	Gmall	Tiall
T-PE	[H]NCCCC[C@H](NC([C@@H](NC([C@H](C(C)C)NC([C@](NC([C@@H]1CCCN1C([C@@H](NC([C@@H](N[H])CC2=CC=CC=C2)=O)CC(C)C)=O)=O)([H])[C@H](CC)C)=O)=O)C)=O)C(N[C@H](C(N[C@H](C(N[C@@H](CO)C(NCC(N[C@H](C(N[C@H](C(N[H])=O)CC(C)C)=O)CC(C)C)=O)=O)=O)CC(C)C)=O)CC(C)C)=O	12.53	35.85	24.25	0.52
E1	[H]NCCCC[C@H](NC([C@@H](NC([C@H](C(C)C)NC([C@](NC([C@@H]1CCCN1C([C@@H](NC([C@H](CCC(O)=O)N[H])=O)CC(C)C)=O)=O)([H])[C@H](CC)C)=O)=O)C)=O)C(N[C@H](C(N[C@H](C(N[C@@H](CO)C(NCC(N[C@H](C(N[C@H](C(N[H])=O)CC(C)C)=O)CC(C)C)=O)=O)=O)CC(C)C)=O)CC(C)C)=O	>256	ND	128	2
E2	OC(CC[C@H](NC([C@@H](N[H])CC1=CC=CC=C1)=O)C(N2CCC[C@H]2C(N[C@@](C(N[C@@H](C(C)C)C(N[C@H](C(N[C@@H](CCCCN[H])C(N[C@H](C(N[C@H](C(N[C@@H](CO)C(NCC(N[C@H](C(N[C@H](C(N[H])=O)CC(C)C)=O)CC(C)C)=O)=O)=O)CC(C)C)=O)CC(C)C)=O)=O)C)=O)=O)([H])[C@H](CC)C)=O)=O)=O	>256	ND	128	2
E3	OC(CC[C@H](NC([C@@H](NC([C@@H](N[H])CC1=CC=CC=C1)=O)CC(C)C)=O)C(N[C@@](C(N[C@@H](C(C)C)C(N[C@H](C(N[C@@H](CCCCN[H])C(N[C@H](C(N[C@H](C(N[C@@H](CO)C(NCC(N[C@H](C(N[C@H](C(N[H])=O)CC(C)C)=O)CC(C)C)=O)=O)=O)CC(C)C)=O)CC(C)C)=O)=O)C)=O)=O)([H])[C@H](CC)C)=O)=O	16.06	ND	55.72	0.29
E4	OC(CC[C@H](NC([C@@H]1CCCN1C([C@@H](NC([C@@H](N[H])CC2=CC=CC=C2)=O)CC(C)C)=O)=O)C(N[C@@H](C(C)C)C(N[C@H](C(N[C@@H](CCCCN[H])C(N[C@H](C(N[C@H](C(N[C@@H](CO)C(NCC(N[C@H](C(N[C@H](C(N[H])=O)CC(C)C)=O)CC(C)C)=O)=O)=O)CC(C)C)=O)CC(C)C)=O)=O)C)=O)=O)=O	>256	ND	111.43	2.3
E5	OC(CC[C@H](NC([C@](NC([C@@H]1CCCN1C([C@@H](NC([C@@H](N[H])CC2=CC=CC=C2)=O)CC(C)C)=O)=O)([H])[C@H](CC)C)=O)C(N[C@H](C(N[C@@H](CCCCN[H])C(N[C@H](C(N[C@H](C(N[C@@H](CO)C(NCC(N[C@H](C(N[C@H](C(N[H])=O)CC(C)C)=O)CC(C)C)=O)=O)=O)CC(C)C)=O)CC(C)C)=O)=O)C)=O)=O	>256	ND	128	2
E6	OC(CC[C@H](NC([C@H](C(C)C)NC([C@](NC([C@@H]1CCCN1C([C@@H](NC([C@@H](N[H])CC2=CC=CC=C2)=O)CC(C)C)=O)=O)([H])[C@H](CC)C)=O)=O)C(N[C@@H](CCCCN[H])C(N[C@H](C(N[C@H](C(N[C@@H](CO)C(NCC(N[C@H](C(N[C@H](C(N[H])=O)CC(C)C)=O)CC(C)C)=O)=O)=O)CC(C)C)=O)CC(C)C)=O)=O)=O	>256	ND	111.43	2.3
E7	OC(CC[C@H](NC([C@@H](NC([C@H](C(C)C)NC([C@](NC([C@@H]1CCCN1C([C@@H](NC([C@@H](N[H])CC2=CC=CC=C2)=O)CC(C)C)=O)=O)([H])[C@H](CC)C)=O)=O)C)=O)C(N[C@H](C(N[C@H](C(N[C@@H](CO)C(NCC(N[C@H](C(N[C@H](C(N[H])=O)CC(C)C)=O)CC(C)C)=O)=O)=O)CC(C)C)=O)CC(C)C)=O)=O	>256	ND	128	2
E8	[H]NCCCC[C@H](NC([C@@H](NC([C@H](C(C)C)NC([C@](NC([C@@H]1CCCN1C([C@@H](NC([C@@H](N[H])CC2=CC=CC=C2)=O)CC(C)C)=O)=O)([H])[C@H](CC)C)=O)=O)C)=O)C(N[C@@H](CCC(O)=O)C(N[C@H](C(N[C@@H](CO)C(NCC(N[C@H](C(N[C@H](C(N[H])=O)CC(C)C)=O)CC(C)C)=O)=O)=O)CC(C)C)=O)=O	>256	ND	128	2
E9	[H]NCCCC[C@H](NC([C@@H](NC([C@H](C(C)C)NC([C@](NC([C@@H]1CCCN1C([C@@H](NC([C@@H](N[H])CC2=CC=CC=C2)=O)CC(C)C)=O)=O)([H])[C@H](CC)C)=O)=O)C)=O)C(N[C@H](C(N[C@@H](CCC(O)=O)C(N[C@@H](CO)C(NCC(N[C@H](C(N[C@H](C(N[H])=O)CC(C)C)=O)CC(C)C)=O)=O)=O)=O)CC(C)C)=O	>256	ND	128	2
E10	[H]NCCCC[C@H](NC([C@@H](NC([C@H](C(C)C)NC([C@](NC([C@@H]1CCCN1C([C@@H](NC([C@@H](N[H])CC2=CC=CC=C2)=O)CC(C)C)=O)=O)([H])[C@H](CC)C)=O)=O)C)=O)C(N[C@H](C(N[C@H](C(N[C@@H](CCC(O)=O)C(NCC(N[C@H](C(N[C@H](C(N[H])=O)CC(C)C)=O)CC(C)C)=O)=O)=O)CC(C)C)=O)CC(C)C)=O	69.93	ND	55.72	1.26
E11	[H]NCCCC[C@H](NC([C@@H](NC([C@H](C(C)C)NC([C@](NC([C@@H]1CCCN1C([C@@H](NC([C@@H](N[H])CC2=CC=CC=C2)=O)CC(C)C)=O)=O)([H])[C@H](CC)C)=O)=O)C)=O)C(N[C@H](C(N[C@H](C(N[C@@H](CO)C(N[C@@H](CCC(O)=O)C(N[C@H](C(N[C@H](C(N[H])=O)CC(C)C)=O)CC(C)C)=O)=O)=O)CC(C)C)=O)CC(C)C)=O	73.97	ND	48.5	1.53
E12	[H]NCCCC[C@H](NC([C@@H](NC([C@H](C(C)C)NC([C@](NC([C@@H]1CCCN1C([C@@H](NC([C@@H](N[H])CC2=CC=CC=C2)=O)CC(C)C)=O)=O)([H])[C@H](CC)C)=O)=O)C)=O)C(N[C@H](C(N[C@H](C(N[C@@H](CO)C(NCC(N[C@@H](CCC(O)=O)C(N[C@H](C(N[H])=O)CC(C)C)=O)=O)=O)=O)CC(C)C)=O)CC(C)C)=O	>256	ND	128	2
E13	[H]NCCCC[C@H](NC([C@@H](NC([C@H](C(C)C)NC([C@](NC([C@@H]1CCCN1C([C@@H](NC([C@@H](N[H])CC2=CC=CC=C2)=O)CC(C)C)=O)=O)([H])[C@H](CC)C)=O)=O)C)=O)C(N[C@H](C(N[C@H](C(N[C@@H](CO)C(NCC(N[C@H](C(N[C@@H](CCC(O)=O)C(N[H])=O)=O)CC(C)C)=O)=O)=O)CC(C)C)=O)CC(C)C)=O	>256	ND	128	2
K10	[H]NCCCC[C@H](NC([C@@H](NC([C@H](C(C)C)NC([C@](NC([C@@H]1CCCN1C([C@@H](NC([C@@H](N[H])CC2=CC=CC=C2)=O)CC(C)C)=O)=O)([H])[C@H](CC)C)=O)=O)C)=O)C(N[C@H](C(N[C@H](C(N[C@@H](CCCCN[H])C(NCC(N[C@H](C(N[C@H](C(N[H])=O)CC(C)C)=O)CC(C)C)=O)=O)=O)CC(C)C)=O)CC(C)C)=O	27.66	ND	36.76	0.75
E10K4K6	[H]NCCCC[C@H](NC([C@@H]1CCCN1C([C@@H](NC([C@@H](N[H])CC2=CC=CC=C2)=O)CC(C)C)=O)=O)C(N[C@@H](C(C)C)C(N[C@@H](CCCCN[H])C(N[C@@H](CCCCN[H])C(N[C@H](C(N[C@H](C(N[C@@H](CCC(O)=O)C(NCC(N[C@H](C(N[C@H](C(N[H])=O)CC(C)C)=O)CC(C)C)=O)=O)=O)CC(C)C)=O)CC(C)C)=O)=O)=O)=O	>256	ND	55.72	4.59
E10K4K11	[H]NCCCC[C@H](NC([C@@H]1CCCN1C([C@@H](NC([C@@H](N[H])CC2=CC=CC=C2)=O)CC(C)C)=O)=O)C(N[C@@H](C(C)C)C(N[C@H](C(N[C@@H](CCCCN[H])C(N[C@H](C(N[C@H](C(N[C@@H](CCC(O)=O)C(N[C@@H](CCCCN[H])C(N[C@H](C(N[C@H](C(N[H])=O)CC(C)C)=O)CC(C)C)=O)=O)=O)CC(C)C)=O)CC(C)C)=O)=O)C)=O)=O	>256	>128	12.13	21.11
E10K6K11	[H]NCCCC[C@H](NC([C@H](C(C)C)NC([C@](NC([C@@H]1CCCN1C([C@@H](NC([C@@H](N[H])CC2=CC=CC=C2)=O)CC(C)C)=O)=O)([H])[C@H](CC)C)=O)=O)C(N[C@@H](CCCCN[H])C(N[C@H](C(N[C@H](C(N[C@@H](CCC(O)=O)C(N[C@@H](CCCCN[H])C(N[C@H](C(N[C@H](C(N[H])=O)CC(C)C)=O)CC(C)C)=O)=O)=O)CC(C)C)=O)CC(C)C)=O)=O	42.55	ND	6.96	6.11
E10K4K6K11	[H]NCCCC[C@H](NC([C@@H]1CCCN1C([C@@H](NC([C@@H](N[H])CC2=CC=CC=C2)=O)CC(C)C)=O)=O)C(N[C@@H](C(C)C)C(N[C@@H](CCCCN[H])C(N[C@@H](CCCCN[H])C(N[C@H](C(N[C@H](C(N[C@@H](CO)C(N[C@@H](CCCCN[H])C(N[C@H](C(N[C@H](C(N[H])=O)CC(C)C)=O)CC(C)C)=O)=O)=O)CC(C)C)=O)CC(C)C)=O)=O)=O)=O	>256	ND	18.38	13.93
K11	[H]NCCCC[C@H](NC([C@@H](NC([C@H](C(C)C)NC([C@](NC([C@@H]1CCCN1C([C@@H](NC([C@@H](N[H])CC2=CC=CC=C2)=O)CC(C)C)=O)=O)([H])[C@H](CC)C)=O)=O)C)=O)C(N[C@H](C(N[C@H](C(N[C@@H](CO)C(N[C@@H](CCCCN[H])C(N[C@H](C(N[C@H](C(N[H])=O)CC(C)C)=O)CC(C)C)=O)=O)=O)CC(C)C)=O)CC(C)C)=O	17.97	ND	36.76	0.49
E11K4K6	[H]NCCCC[C@H](NC([C@@H]1CCCN1C([C@@H](NC([C@@H](N[H])CC2=CC=CC=C2)=O)CC(C)C)=O)=O)C(N[C@@H](C(C)C)C(N[C@@H](CCCCN[H])C(N[C@@H](CCCCN[H])C(N[C@H](C(N[C@H](C(N[C@@H](CO)C(N[C@@H](CCC(O)=O)C(N[C@H](C(N[C@H](C(N[H])=O)CC(C)C)=O)CC(C)C)=O)=O)=O)CC(C)C)=O)CC(C)C)=O)=O)=O)=O	>256	ND	36.76	6.96
E11K4K10	[H]NCCCC[C@H](NC([C@@H]1CCCN1C([C@@H](NC([C@@H](N[H])CC2=CC=CC=C2)=O)CC(C)C)=O)=O)C(N[C@@H](C(C)C)C(N[C@H](C(N[C@@H](CCCCN[H])C(N[C@H](C(N[C@H](C(N[C@@H](CCCCN[H])C(N[C@@H](CCC(O)=O)C(N[C@H](C(N[C@H](C(N[H])=O)CC(C)C)=O)CC(C)C)=O)=O)=O)CC(C)C)=O)CC(C)C)=O)=O)C)=O)=O	202	>128	8	25.25
E11K6K10	[H]NCCCC[C@H](NC([C@H](C(C)C)NC([C@](NC([C@@H]1CCCN1C([C@@H](NC([C@@H](N[H])CC2=CC=CC=C2)=O)CC(C)C)=O)=O)([H])[C@H](CC)C)=O)=O)C(N[C@@H](CCCCN[H])C(N[C@H](C(N[C@H](C(N[C@@H](CCCCN[H])C(N[C@@H](CCC(O)=O)C(N[C@H](C(N[C@H](C(N[H])=O)CC(C)C)=O)CC(C)C)=O)=O)=O)CC(C)C)=O)CC(C)C)=O)=O	53.73	ND	6.96	7.71
E11K4K6K10	[H]NCCCC[C@H](NC([C@@H]1CCCN1C([C@@H](NC([C@@H](N[H])CC2=CC=CC=C2)=O)CC(C)C)=O)=O)C(N[C@@H](C(C)C)C(N[C@@H](CCCCN[H])C(N[C@@H](CCCCN[H])C(N[C@H](C(N[C@H](C(N[C@@H](CCCCN[H])C(N[C@@H](CCC(O)=O)C(N[C@H](C(N[C@H](C(N[H])=O)CC(C)C)=O)CC(C)C)=O)=O)=O)CC(C)C)=O)CC(C)C)=O)=O)=O)=O	>256	ND	16	16
